# Supplementary material for: À la Recherche du Temps Perdu: extracting temporal relations from medical text in the 2012 i2b2 NLP challenge
Source: PubMed Central journal article supplement — J Am Med Inform Assoc. 2013 Mar 23;20(5):843–8. doi: 10.1136/amiajnl-2013-001624 (PMC3756270; doi:10.1136/amiajnl-2013-001624), 2013-03-23
Supplement: amiajnl-2013-001624-s2.pdf [file amiajnl-2013-001624-s2.pdf]

## Online Appendix B

Time lexicon. Free to use, provided that this paper is cited in all publications and documentation.

| Group  | Terms                                                                                                                                                                                                                                                                                                                                                                                                                                                                                                                                                                                                                                                                                                                                                                                                                                                                                                                                                                                                                                                                                                                                                                                                                                                                                                                                                                                                                                                                                                                                                                                                                                                                                                                                                                                                                                                                                                                                                                                                                                                                                                                                                                                                                                                                                                                                                                                                                                                                                                                                                                                                                                                                                                                                                                                                                                                                                           |
|--------|-------------------------------------------------------------------------------------------------------------------------------------------------------------------------------------------------------------------------------------------------------------------------------------------------------------------------------------------------------------------------------------------------------------------------------------------------------------------------------------------------------------------------------------------------------------------------------------------------------------------------------------------------------------------------------------------------------------------------------------------------------------------------------------------------------------------------------------------------------------------------------------------------------------------------------------------------------------------------------------------------------------------------------------------------------------------------------------------------------------------------------------------------------------------------------------------------------------------------------------------------------------------------------------------------------------------------------------------------------------------------------------------------------------------------------------------------------------------------------------------------------------------------------------------------------------------------------------------------------------------------------------------------------------------------------------------------------------------------------------------------------------------------------------------------------------------------------------------------------------------------------------------------------------------------------------------------------------------------------------------------------------------------------------------------------------------------------------------------------------------------------------------------------------------------------------------------------------------------------------------------------------------------------------------------------------------------------------------------------------------------------------------------------------------------------------------------------------------------------------------------------------------------------------------------------------------------------------------------------------------------------------------------------------------------------------------------------------------------------------------------------------------------------------------------------------------------------------------------------------------------------------------------|
| BEFORE | afore   aforesaid   aforesaid   ahead   ahead of   already   and then   ante   ante-   antecedent   antecedently   before   before present   beforehand   by the time   earlier   early   ere   first   firstly   fore   foregoing   former   formerly   heretofore   in advance   in advance of   in days of yore   in old days   on the eve of   once   past   pre-   precede   preceded   precedent   precedes   preceding   preceding the time when   precipitate   precipitated   precipitates   precipitating   precursive   precursory   preliminary   preop   preoperatively   preparatory   preprandial   previous   previous to   previously   prior   prior to   since   sooner   sooner than   then   to come   until   up front   up to now                                                                                                                                                                                                                                                                                                                                                                                                                                                                                                                                                                                                                                                                                                                                                                                                                                                                                                                                                                                                                                                                                                                                                                                                                                                                                                                                                                                                                                                                                                                                                                                                                                                                                                                                                                                                                                                                                                                                                                                                                                                                                                                                        |
| AFTER  | a while later   after   after that   after this   afterward   afterwards   at a later time   behind   by and by   consequently   ensuingly   eventually   follow   followed   following   follows   from that day forward   from that day on   from there forward   from there on   hereafter   in a while   later   latterly   next   on the next day   post   post-   postoperative   postoperatively   since   soon   subsequent   subsequently   then   thenceforth   thenceforward   thereafter   thereon   ultimately                                                                                                                                                                                                                                                                                                                                                                                                                                                                                                                                                                                                                                                                                                                                                                                                                                                                                                                                                                                                                                                                                                                                                                                                                                                                                                                                                                                                                                                                                                                                                                                                                                                                                                                                                                                                                                                                                                                                                                                                                                                                                                                                                                                                                                                                                                                                                                     |
| CAUSES | accordingly   account for   accounted for   accounting for   accounts for   affect   affected   affecting   affects   are responsible for   arouse   aroused   arouses   arousing   as a consequence   as a result   as expected   became   because   because of   become   becomes   becoming   block   blocked   blocking   blocks   bring about   brings about   brought about   can generate   can lead to   cause   cause of   cause these symptoms   caused   caused by   causes   causing   change   changed   changes   changing   consequently   contribute to   contributed to   contributes to   contributing to   could generate   create   created   creates   creating   develop   developed   developing   develops   due to   effect   enable   enabled   enables   enabling   evoke   evoked   evokes   evoking   for   for this reason   force   forced   forces   forcing   form   formed   forming   forms   gave rise to   generate   generated   generates   generating   give rise to   given   gives rise to   giving rise to   had an effect   hamper   hampered   hampering   hampers   has an effect   have an effect   having an effect   impede   impeded   impedes   impeding   in consequence   in effect   incite   incited   incites   inciting   increase   increased   increases   increasing   indicate   indicated   indicates   indicating   induce   induced   induces   inducing   influence   influenced   influences   influencing   interfere with   interfered with   interferes with   interfering with   is blamed for   is responsible for   lead to   leading to   leads to   leave   leaves   leaving   led to   left   made   made possible   make   make possible   makes   makes possible   making   making possible   motivate   motivated   motivates   motivating   perpetuate   perpetuated   perpetuates   perpetuating   play a role in   played a role in   playing a role in   plays a role in   precipitate   precipitated   precipitates   precipitating   prerequisite   prerequisites   prevent   prevented   preventing   prevents   produce   produced   produces   producing   promote   promoted   promotes   promoting   prompt   prompted   prompting   prompts   provoke   provoked   provokes   provoking   raise   raised   raises   raising   reduce   reduced   reduces   reducing   render   rendered   rendering   renders   require   required   requires   requiring   restrain   restrained   restraining   restrains   result   result in   resulted   resulted in   resulting   resulting in   results   results in   since   slow   slowed   slowing   slows   so   so that   spark   sparked   sparking   sparks   stimulate   stimulated   stimulates   stimulating   such that   the reason for   trigger   triggered   triggering   triggers   was responsible for   yield   yielded   yielding   yields |

|            |                                                                                                                                                                                                                                                                                                                                                                                                                                                                                                                                                                                                                                                                                                                                                                                                                                                                                                                                                                                                                                                                                                                                                       |
|------------|-------------------------------------------------------------------------------------------------------------------------------------------------------------------------------------------------------------------------------------------------------------------------------------------------------------------------------------------------------------------------------------------------------------------------------------------------------------------------------------------------------------------------------------------------------------------------------------------------------------------------------------------------------------------------------------------------------------------------------------------------------------------------------------------------------------------------------------------------------------------------------------------------------------------------------------------------------------------------------------------------------------------------------------------------------------------------------------------------------------------------------------------------------|
| CAUSED BY  | as soon as   attributed to   because   because of   derive from   derived from   deriving from   due to   effect of   follow from   followed from   following from   follows from   is attributed to   is a result of   is a consequence of   now that   occur from   occurred from   occurring from   occurs from   on account of   originate from   originate in   originate with   originated from   originated in   originated with   originates from   originates in   originates with   originating from   originating in   originating with   owing to   result from   result of   resulted from   resulting from   results from   stem from   stemmed from   stemming from   stems from   thanks to                                                                                                                                                                                                                                                                                                                                                                                                                                           |
| DURING     | accompanied   accompanies   accompanying   ad interim   all along   all the time   all the while   all through   amid   at that same time   at that time   at the same time   at the time   at this same time   at this time as well   attendant   coexist   coexisted   coexisting   coincide   coincided   coincident   coincidentally   coincides   coinciding   coinciding   concomitant   concomitantly   concurrent   concurrently   conjoint   conjointly   contemporaneous   contemporaneously   during   during the interval   for now   for the duration   for the moment   for the time being   from beginning to end   from start to finish   in conjunction   in the course of   in the interim   in the interval   in the meantime   in the meanwhile   in the middle of   in the time of   inextricably   inseparably   intraoperatively   jointly   linked   meantime   meanwhile   mid   midst   over   pending   simultaneous   simultaneously   synchronically   synchronous   synchronously   the time between   the whole time   through the whole of   throughout   throughout the   together   when   when the patient   while |
| STARTING   | at first   at the start   began   beginning   begins   begun   commence   commenced   commences   commencing   embark on   embarked on   embarking on   embarks on   first of all   get started   gets started   getting started   got started   in the beginning   initial   initially   initiate   initiated   initiates   initiating   lead off   leading off   leads off   led off   onset   recommence   recommenced   recommences   recommencing   restart   restarted   restarting   restarts   set out   sets out   setting out   start   start out   started   started out   starting   starting out   starts   starts out                                                                                                                                                                                                                                                                                                                                                                                                                                                                                                                   |
| CONTINUING | continually   continue   continues   continuing   continuous   lasting   lasts   ongoing   persisting   persists   prolonged   recurrence   recurring   remain   remained   remaining   resumed   still   sustained   sustaining   unchanged   unchanging   undergoing                                                                                                                                                                                                                                                                                                                                                                                                                                                                                                                                                                                                                                                                                                                                                                                                                                                                                |
| ENDING     | after all   at last   at length   at long last   at the close   at the end of the day   conclusively   eventually   finally   in due time   in the end   in the long run   lastly   someday   ultimately                                                                                                                                                                                                                                                                                                                                                                                                                                                                                                                                                                                                                                                                                                                                                                                                                                                                                                                                              |
| SUDDENLY   | abruptly   all at once   all of a sudden   asudden   immediately   instantly   just then   on spur of moment   precipitately   straightaway   sudden   suddenly   tout de suite   unexpectedly   without warning                                                                                                                                                                                                                                                                                                                                                                                                                                                                                                                                                                                                                                                                                                                                                                                                                                                                                                                                      |
| NOW        | at this point   currently   now   right away   right now   soon                                                                                                                                                                                                                                                                                                                                                                                                                                                                                                                                                                                                                                                                                                                                                                                                                                                                                                                                                                                                                                                                                       |
| SAYS       | says   said   note   notes   noted   told   tells   presents   presented   describes   described   states   stated   denied   denies   complains   complained   report   reports   reported                                                                                                                                                                                                                                                                                                                                                                                                                                                                                                                                                                                                                                                                                                                                                                                                                                                                                                                                                           |
